# Supplementary material for: IL-4 orchestrates STAT6-mediated DNA demethylation leading to dendritic cell differentiation
Source: PubMed Central journal article supplement (PMC4711003; doi:10.1186/s13059-015-0863-2), 2016-01-13

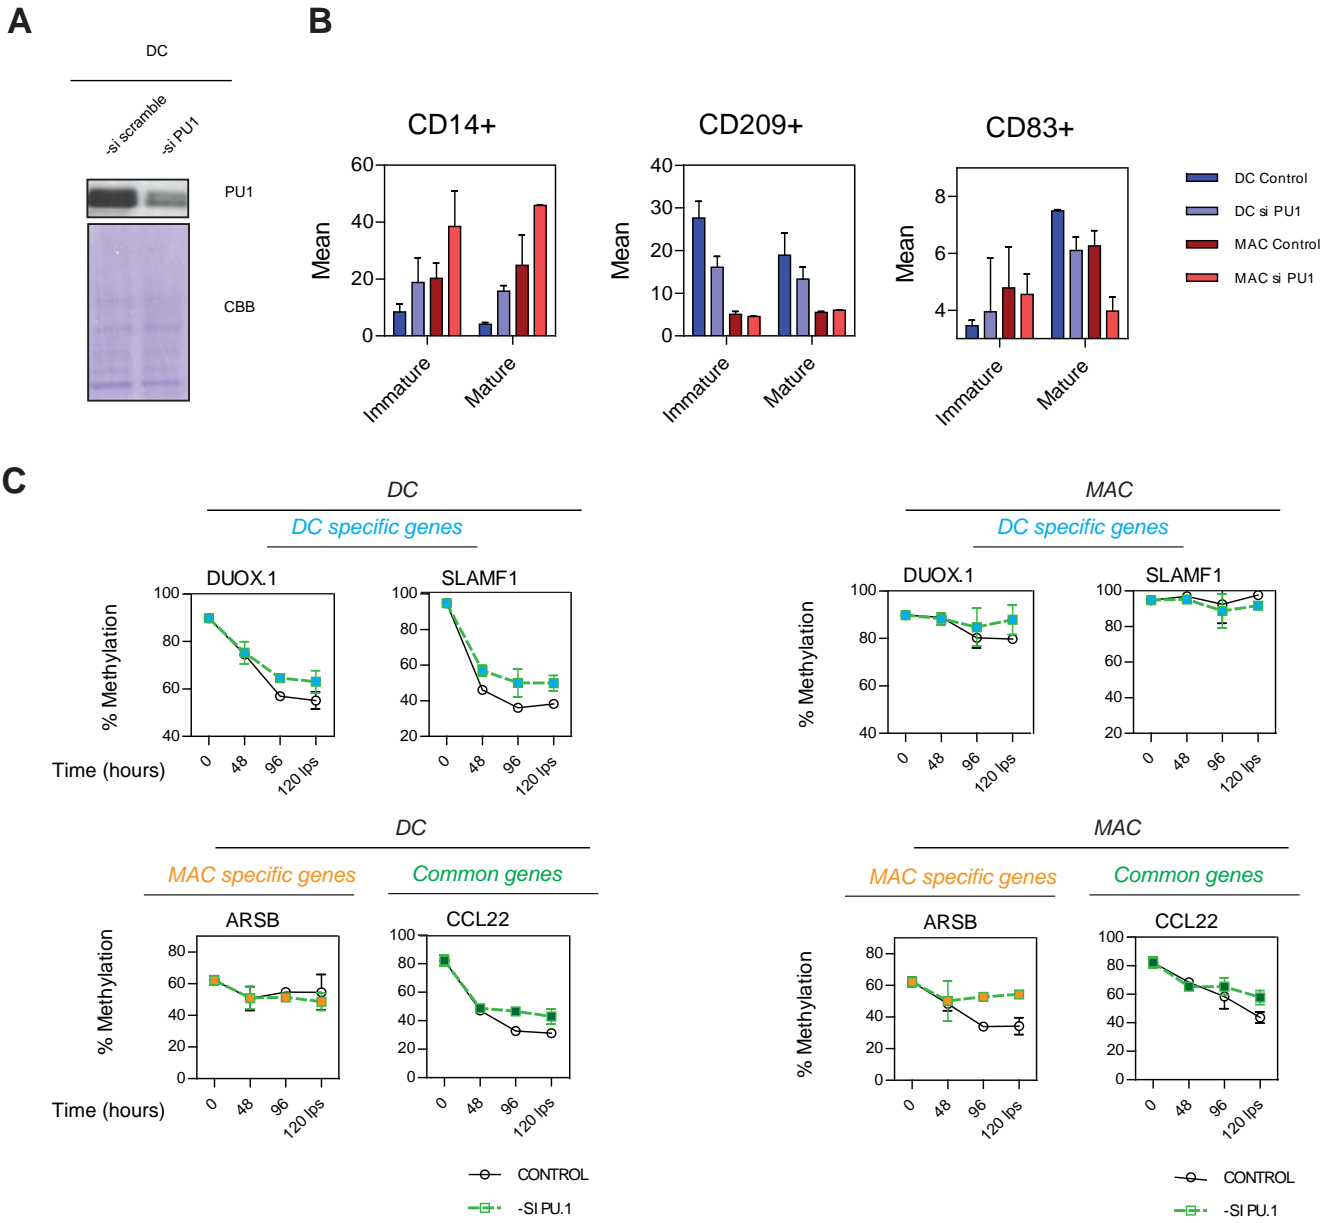

Supplement: 13059_2015_863_MOESM10_ESM.pdf [file 13059_2015_863_MOESM10_ESM.pdf]
